# Supplementary material
Source: PubMed Central journal article supplement (PMC7060080)
Supplement: EMS85446-supplement-Supplementary_tables.pdf [file EMS85446-supplement-Supplementary_tables.pdf]

**Supplementary Table 1. Small Intestinal Organoid Mass Cytometry Antibody Panel**

| Isotope-Metal | Antigen / Target                                                                 | Antibody Clone  | Supplier        |
|---------------|----------------------------------------------------------------------------------|-----------------|-----------------|
| 89-Y          | Phospho-Histone H3 [S28]                                                         | HTA28           | BioLegend       |
| 113-In        | CD326 (EpCAM)                                                                    | G8.8            | BioLegend       |
| 115-In        | Pan-Cytokeratin (Pan-CK)                                                         | AE1/AE3         | BioLegend       |
| 124-Te        | TOBis Barcode                                                                    | -               | Prof. Mark Nitz |
| 126-Te        | TOBis Barcode                                                                    | -               | Prof. Mark Nitz |
| 127-I         | IdU (S-phase)                                                                    | -               | Fluidigm        |
| 128-Te        | TOBis Barcode                                                                    | -               | Prof. Mark Nitz |
| 130-Te        | TOBis Barcode                                                                    | -               | Prof. Mark Nitz |
| 141-Pr        | Phospho-PDPK1 [S241]                                                             | J66-653.44.22   | BD Biosciences  |
| 142-Nd        | Cleaved-Caspase 3 [D175]                                                         | D3E9            | CST             |
| 143-Nd        | C-MYC                                                                            | D84C12          | CST             |
| 144-Nd        | Lysozyme                                                                         | BGN/06/961      | Abcam           |
| 145-Nd        | FABP1                                                                            | 328605          | R&D Systems     |
| 146-Nd        | Phospho-MKK4/SEK1 [S257]                                                         | C36C11          | CST             |
| 147-Sm        | Phospho-BTK [Y551]                                                               | 24a/BTK         | BD Biosciences  |
| 148-Nd        | Phospho-SRC [Y418]                                                               | SC1T2M3         | Thermo          |
| 149-Sm        | Phospho-4E-BP1 [T37/46]                                                          | 236B4           | CST             |
| 150-Nd        | Phospho-RB [S807/811]                                                            | J112-906        | BD Biosciences  |
| 151-Eu        | Phospho-PKCα [T497]                                                              | K14-984         | BD Biosciences  |
| 152-Sm        | Phospho-AKT [T308]                                                               | J1-223.371      | BD Biosciences  |
| 153-Eu        | Phospho-CREB [S133]                                                              | 87G3            | CST             |
| 154-Sm        | Phospho-SMAD1 [S463/465]<br>Phospho-SMAD5 [S463/465]<br>Phospho-SMAD9 [S465/467] | D5B10           | CST             |
| 155-Gd        | Phospho-AKT [S473]                                                               | D9E             | CST             |
| 156-Gd        | Phospho-NF-κB p65 [S529]                                                         | K10-895.12.50   | BD Biosciences  |
| 157-Gd        | Phospho-MKK3 [S189] / MKK6 [S207]                                                | D8E9            | CST             |
| 158-Gd        | Phospho-p38 MAPK [T180/Y182]                                                     | D3F9            | CST             |
| 159-Tb        | Phospho-MAPKAPK2 [T334]                                                          | 27B7            | CST             |
| 160-Gd        | Phospho-AMPKα [T172]                                                             | 40H9            | CST             |
| 161-Dy        | Phospho-BAD [S112]                                                               | 40A9            | CST             |
| 162-Dy        | LRIG1                                                                            | Polyclonal      | R&D Systems     |
| 163-Dy        | Phospho-p90RSK [T359]                                                            | D1E9            | CST             |
| 164-Dy        | Phospho-p120-Catenin [T310]                                                      | 22/p120 (pT310) | BD Biosciences  |
| 165-Ho        | β-Catenin [Active]                                                               | D13A1           | CST             |
| 166-Er        | Phospho-GSK-3β [S9]                                                              | D85E12          | CST             |
| 167-Er        | Phospho-ERK1/2 [T202/Y204]                                                       | 20A             | BD Biosciences  |
| 168-Er        | Phospho-SMAD2 [S465/467]<br>Phospho-SMAD3 [S423/425]                             | D27F4           | CST             |
| 169-Tm        | GFP                                                                              | 5F12.4          | Fluidigm        |
| 170-Er        | Phospho-MEK1/2 [S221]                                                            | 166F8           | CST             |
| 171-Yb        | CLCA1                                                                            | EPR12254-88     | Abcam           |
| 172-Yb        | Phospho-S6 [S235/236]                                                            | D57.2.2E        | CST             |
| 173-Yb        | DCAMKL1                                                                          | 6F9             | Sigma           |
| 174-Yb        | Chr-A                                                                            | C-12            | Santa Cruz      |
| 175-Lu        | CD44                                                                             | IM7             | BioLegend       |
| 176-Yb        | Cyclin B1                                                                        | GNS-11          | BD Biosciences  |
| 191-Ir        | DNA                                                                              | -               | Fluidigm        |
| 193-Ir        | DNA                                                                              | -               | Fluidigm        |
| 194-Pt        | Cisplatin (Dead Cells)                                                           | -               | Fluidigm        |
| 196-Pt        | TOBis Barcode                                                                    | -               | Fluidigm        |
| 198-Pt        | TOBis Barcode                                                                    | -               | Fluidigm        |
| 209-Bi        | Di-Methyl-Histone H3 [K4]                                                        | C64G9           | CST             |

Extracellular  
Intracellular  
Non-Antibody Parameter

## Supplementary Table 2. Colorectal Cancer Tumour Microenvironment Mass Cytometry Antibody Panel

| Isotope-Metal | Antigen / Target                                                                 | Antibody Clone  | Supplier        |
|---------------|----------------------------------------------------------------------------------|-----------------|-----------------|
| 89-Y          | Phospho-Histone H3 [S28]                                                         | HTA28           | BioLegend       |
| 113-In        | CD66a (CEACAM1)                                                                  | CC1             | Thermo          |
| 115-In        | Pan-Cytokeratin (Pan-CK)                                                         | AE1/AE3         | BioLegend       |
| 124-Te        | TOBis Barcode                                                                    | -               | Prof. Mark Nitz |
| 126-Te        | TOBis Barcode                                                                    | -               | Prof. Mark Nitz |
| 127-I         | IdU (S-phase)                                                                    | -               | Fluidigm        |
| 128-Te        | TOBis Barcode                                                                    | -               | Prof. Mark Nitz |
| 130-Te        | TOBis Barcode                                                                    | -               | Prof. Mark Nitz |
| 141-Pr        | Phospho-PDPK1 [S241]                                                             | J66-653.44.22   | BD Biosciences  |
| 142-Nd        | Cleaved-Caspase 3 [D175]                                                         | D3E9            | CST             |
| 143-Nd        | C-MYC                                                                            | D84C12          | CST             |
| 144-Nd        | Phospho-MEK1/2 [S221]                                                            | 166F8           | CST             |
| 145-Nd        | Na/K-ATPase                                                                      | EP1845Y         | Abcam           |
| 146-Nd        | Phospho-MKK4/SEK1 [S257]                                                         | C36C11          | CST             |
| 147-Sm        | Phospho-BTK [Y551]                                                               | 24a/BTK         | BD Biosciences  |
| 148-Nd        | Phospho-SRC [Y418]                                                               | SC1T2M3         | BD Biosciences  |
| 149-Sm        | Phospho-4E-BP1 [T37/46]                                                          | 236B4           | CST             |
| 150-Nd        | Phospho-RB [S807/811]                                                            | J112-906        | BD Biosciences  |
| 151-Eu        | Phospho-PKCα [T497]                                                              | K14-984         | BD Biosciences  |
| 152-Sm        | Phospho-AKT [T308]                                                               | J1-223.371      | BD Biosciences  |
| 153-Eu        | Phospho-CREB [S133]                                                              | 87G3            | CST             |
| 154-Sm        | Phospho-SMAD1 [S463/465]<br>Phospho-SMAD5 [S463/465]<br>Phospho-SMAD9 [S465/467] | D5B10           | CST             |
| 155-Gd        | Phospho-AKT [S473]                                                               | D9E             | CST             |
| 156-Gd        | Phospho-NF-κB p65 [S529]                                                         | K10-895.12.50   | BD Biosciences  |
| 157-Gd        | Phospho-MKK3 [S189] / MKK6 [S207]                                                | D8E9            | CST             |
| 158-Gd        | Phospho-p38 MAPK [T180/Y182]                                                     | D3F9            | CST             |
| 159-Tb        | Phospho-MAPKAPK2 [T334]                                                          | 27B7            | CST             |
| 160-Gd        | Phospho-AMPKα [T172]                                                             | 40H9            | CST             |
| 161-Dy        | Phospho-BAD [S112]                                                               | 40A9            | CST             |
| 162-Dy        | LRIG1                                                                            | Polyclonal      | R&D Systems     |
| 163-Dy        | Phospho-p90RSK [T359]                                                            | D1E9            | CST             |
| 164-Dy        | Phospho- p120-Catenin [T310]                                                     | 22/p120 (pT310) | BD Biosciences  |
| 165-Ho        | β-Catenin [Active]                                                               | D13A1           | CST             |
| 166-Er        | Phospho-GSK-3β [S9]                                                              | D85E12          | CST             |
| 167-Er        | Phospho-ERK1/2 [T202/Y204]                                                       | 20A             | BD Biosciences  |
| 168-Er        | Phospho-SMAD2 [S465/467]<br>Phospho-SMAD3 [S423/425]                             | D27F4           | CST             |
| 169-Tm        | Phospho-STAT3 [Y705]                                                             | 4/P-STAT3       | BD Biosciences  |
| 170-Er        | Arginase-1                                                                       | D4E3MTM         | CST             |
| 171-Yb        | F4/80                                                                            | BM8             | BioLegend       |
| 172-Yb        | Phospho-S6 [S235/236]                                                            | D57.2.2E        | CST             |
| 173-Yb        | Podoplanin (PDPN)                                                                | 8.1.1           | BioLegend       |
| 174-Yb        | RFP                                                                              | 8E5.G7          | Rockland        |
| 175-Lu        | CD44                                                                             | IM7             | BioLegend       |
| 176-Yb        | Cyclin B1                                                                        | GNS-11          | BD Biosciences  |
| 191-Ir        | DNA                                                                              | -               | Fluidigm        |
| 193-Ir        | DNA                                                                              | -               | Fluidigm        |
| 194-Pt        | Cisplatin (Dead Cells)                                                           | -               | Fluidigm        |
| 196-Pt        | TOBis Barcode                                                                    | -               | Fluidigm        |
| 198-Pt        | TOBis Barcode                                                                    | -               | Fluidigm        |
| 209-Bi        | CD68                                                                             | FA-11           | BioLegend       |

Extracellular  
Intracellular  
Non-Antibody Parameter

**Supplementary Table 3. TOBis Matrix for Organoid Time-Course**

|       | TeMal             |                   |                   |                   | Cisplatin         |                   |
|-------|-------------------|-------------------|-------------------|-------------------|-------------------|-------------------|
|       | <sup>124</sup> Te | <sup>126</sup> Te | <sup>128</sup> Te | <sup>130</sup> Te | <sup>196</sup> Pt | <sup>198</sup> Pt |
| Day 1 | +                 | -                 | +                 | -                 | -                 | +                 |
| Day 2 | +                 | -                 | -                 | +                 | -                 | +                 |
| Day 3 | +                 | -                 | -                 | -                 | +                 | +                 |
| Day 4 | -                 | +                 | +                 | +                 | -                 | -                 |
| Day 5 | -                 | +                 | -                 | -                 | +                 | +                 |
| Day 6 | -                 | -                 | +                 | -                 | +                 | +                 |
| Day 7 | -                 | -                 | -                 | +                 | +                 | +                 |

**Supplementary Table 4. TOBis Matrix for CRC TME Model**

| Genotype | Microenvironment                   | TeMal             |                   |                   |                   | Cisplatin         |                   |
|----------|------------------------------------|-------------------|-------------------|-------------------|-------------------|-------------------|-------------------|
|          |                                    | <sup>124</sup> Te | <sup>126</sup> Te | <sup>128</sup> Te | <sup>130</sup> Te | <sup>196</sup> Pt | <sup>198</sup> Pt |
| WT       | Organoid                           | +                 | -                 | -                 | -                 | +                 | +                 |
|          | Organoid / Macrophage              | +                 | +                 | -                 | -                 | -                 | +                 |
|          | Organoid / Fibroblast              | -                 | -                 | +                 | +                 | +                 | -                 |
|          | Organoid / Fibroblast / Macrophage | +                 | -                 | +                 | +                 | -                 | -                 |
| A        | Organoid                           | +                 | -                 | +                 | -                 | +                 | -                 |
|          | Organoid / Macrophage              | +                 | -                 | -                 | +                 | +                 | -                 |
|          | Organoid / Fibroblast              | +                 | -                 | +                 | -                 | -                 | +                 |
|          | Organoid / Fibroblast / Macrophage | +                 | -                 | -                 | +                 | -                 | +                 |
| AK       | Organoid                           | +                 | +                 | +                 | -                 | -                 | -                 |
|          | Organoid / Macrophage              | -                 | +                 | +                 | -                 | +                 | -                 |
|          | Organoid / Fibroblast              | -                 | +                 | +                 | +                 | -                 | -                 |
|          | Organoid / Fibroblast / Macrophage | -                 | +                 | +                 | -                 | -                 | +                 |
| AKP      | Organoid                           | -                 | +                 | -                 | +                 | +                 | -                 |
|          | Organoid / Macrophage              | -                 | +                 | -                 | -                 | +                 | +                 |
|          | Organoid / Fibroblast              | -                 | +                 | -                 | +                 | -                 | +                 |
|          | Organoid / Fibroblast / Macrophage | +                 | +                 | -                 | -                 | +                 | -                 |
|          | Macrophage                         | -                 | -                 | +                 | -                 | +                 | +                 |
|          | Fibroblast                         | -                 | -                 | +                 | +                 | -                 | +                 |
|          | Fibroblast / Macrophage            | -                 | -                 | -                 | +                 | +                 | +                 |
